# Supplementary material for: Bioactive hyperbranched polymer dot combined laser-induced optical breakdown for accelerating wound repair and regeneration in a nude mice model
Source: Royal Society of Chemistry journal article supplement (doi:10.1039/d4ma01256a), 2025-01-01
Supplement: d4ma01256a1.pdf [file d4ma01256a1.pdf]

## Supporting Information

A.

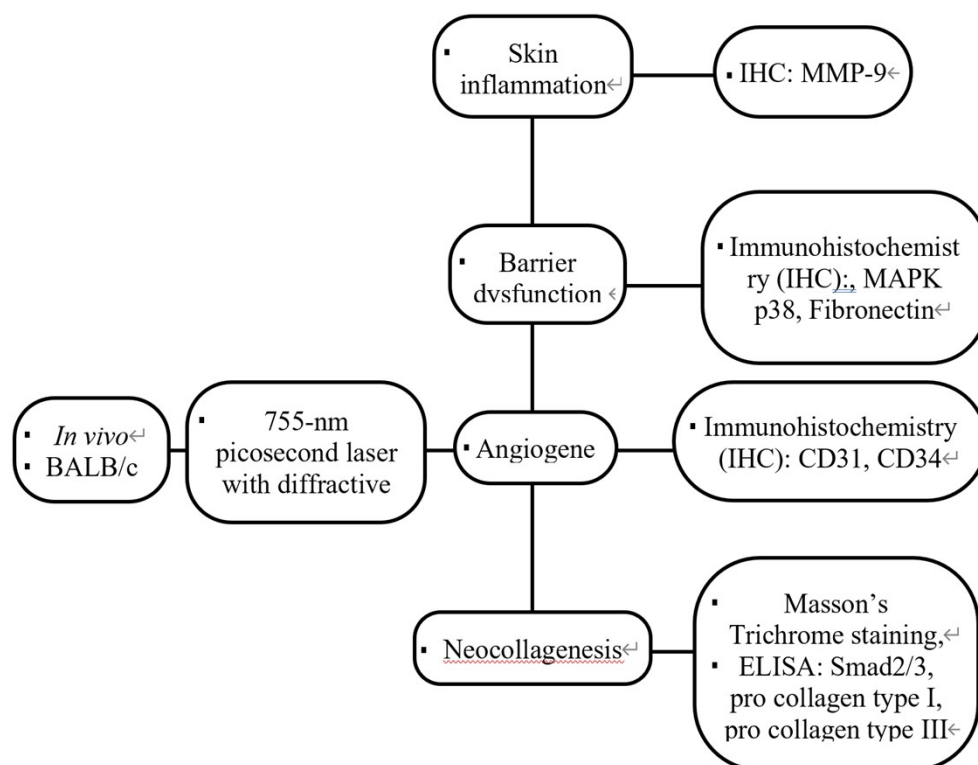

B.

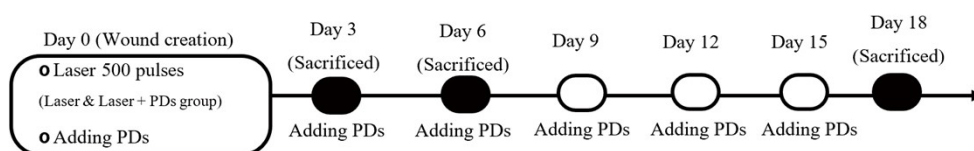

**Figure S1. Experimental design and timeline for evaluating the effects of picosecond laser and Hyperbranched Polymer Dots on wound healing in a nude mouse model.** (A) Schematic illustration of the combination therapy using Hyperbranched Polymer Dots (PDs) and Laser-Induced Optical Breakdown (LIOB) for wound healing. (B) Timeline of experimental procedures, including wound creation, laser treatment, PDs application, and assessment timepoints.
